# Supplementary material for: Environmental modulation of the proteomic profiles from closely phylogenetically related populations of the red seaweed Plocamium brasiliense
Source: PeerJ. 2019 Apr 2;7:e6469. doi: 10.7717/peerj.6469 (PMC6450377; doi:10.7717/peerj.6469)
Supplement: Supplemental Information 1 [file peerj-07-6469-s001.xlsx]

## Sheet: Sheet1
Specimen ID	COI	UPA/23S	rbcL
L_majuscula_ARS00686	x	x	-
P_cartilagineum_10ca003	x	x	-
P_maggsiae_GWS001754	x	-	x
P_sandvicense_ARS00933	x	x	-
P_sandvicense_ARS00240	x	x	-
P_telfairiae_mbccc11	x	x	-
P_telfairiae_mbccc22	x	x	-
P_telfairiae_mbccc93	x	x	-
P_telfairiae_120429-09	x	x	-
Arraial1	-	x	-
Arraial2	-	x	x
Arraial3	x	x	-
Arraial4	x	x	-
Arraial5	x	x	-
Arraial6	-	-	x
Arraial7	x	x	-
Arraial8	-	-	x
Arraial9	-	x	-
Arraial10	-	-	x
Búzios1	-	x	x
Búzios2	-	x	x
Búzios3	x	-	x
Búzios4	x	x	x
Búzios5	x	x	x
Búzios6	x	x	x
Búzios7	x	x	-
Búzios8	-	x	x
Búzios10	-	-	x
