# Supplementary material for: Environmental modulation of the proteomic profiles from closely phylogenetically related populations of the red seaweed Plocamium brasiliense
Source: PeerJ. 2019 Apr 2;7:e6469. doi: 10.7717/peerj.6469 (PMC6450377; doi:10.7717/peerj.6469)
Supplement: Supplemental Information 3 [file peerj-07-6469-s003.xlsx]

## Sheet: 2A
Protein Identification	Protein Number	Organism	Protein Mass	Score	Number of Matched Peptides	Phyllum
gi|255545736	14-3-3 protein	[Ricinus communis]	29107	76	2	mamona/planta
gi|514749793	actin	[Setaria italica]	51882	81	2	Plantae
gi|514749793	actin	[Setaria italica]	51882	108	2	Plantae
gi|475669071	actin	[Fusarium oxysporum f. sp. cubense race 4]	46063	190	4	fungo
gi|738534591	allophycocyanin	[Myxosarcina sp. GI1]	17770	167	5	cyanobacteria
gi|738534591	allophycocyanin	[Myxosarcina sp. GI1]	17770	121	3	cyanobacteria
gi|451810083	allophycocyanin	[Palmaria palmata]	17667	156	4	Rhodophyta
gi|11465728	allophycocyanin	[Porphyra purpurea]	17669	176	5	Rhodophyta
gi|11465728	allophycocyanin	[Porphyra purpurea]	17669	221	5	Rhodophyta
gi|595789497	allophycocyanin	[Gracilaria salicornia]	17625	270	7	Rhodophyta
gi|595789497	allophycocyanin	[Gracilaria salicornia]	17625	298	8	Rhodophyta
gi|641453089	allophycocyanin	[Cyanidiaceae sp. MX-AZ01]	17865	158	4	Rhodophyta
gi|451810084	allophycocyanin	[Palmaria palmata]	17558	89	3	Rhodophyta
gi|519704838	allophycocyanin	[Grateloupia taiwanensis]	17587	151	4	Rhodophyta
gi|501379579	allophycocyanin	[Nostoc punctiforme]	17442	188	4	Cyanobacteria
gi|505034356	allophycocyanin	[Cyanobacterium stanieri]	17605	97	3	Cyanobacteria
gi|471435007	allophycocyanin	[Chondrus crispus]	17539	115	3	Rhodophyta
gi|471435007	allophycocyanin	[Chondrus crispus]	17539	96	3	Rhodophyta
gi|129987	allophycocyanin	[Aglaothamnion neglectum]	17645	270	7	Rhodophyta
gi|738534591	allophycocyanin	[Myxosarcina sp. GI1]	17770	133	4	cyanobacteria
gi|501673254	allophycocyanin	[Calliarthron tuberculosum]	17589	150	4	Rhodophyta
gi|471435007	allophycocyanin	[Chondrus crispus]	17539	147	5	Rhodophyta
gi|652391413	allophycocyanin	[Planktothrix]	17151	145	5	Cyanobacteria
gi|129987	allophycocyanin	[Aglaothamnion neglectum]	17645	140	4	Rhodophyta
gi|537844082	ATP synthase	[Diplazium latifrons]	43252	68	2	planta
gi|6689006	ATP synthase	[Phyllonoma laticuspis]	53724	413	9	planta
gi|671725368	ATP synthase	[Solenostoma sphaerocarpum]	41061	129	2	Bryophyta
gi|671725368	ATP synthase	[Solenostoma sphaerocarpum]	41061	93	2	Bryophyta
gi|37720943	ATP synthase	[Triantha glutinosa]	52757	140	3	Monocots
gi|501673256	ATP synthase	[Calliarthron tuberculosum]	51343	406	9	Rhodophyta
gi|546299755	ATPase	[Chondrus crispus]	57507	216	5	Rhodophyta
gi|546307383	fructose-1,6-bisphosphatase	[Chondrus crispus]	44339	145	2	Rhodophyta
gi|504250198	glyceraldehyde-3-phosphate dehydrogenase	[Phycisphaera mikurensis]	36655	100	2	bacteria
gi|30580445	glyceraldehyde-3-phosphate dehydrogenase	[Mucor circinelloides f. lusitanicus]	36508	120	2	Fungi
gi|30580445	glyceraldehyde-3-phosphate dehydrogenase	[Mucor circinelloides f. lusitanicus]	36508	132	2	Fungi
gi|3098140	heat shock protein 70	[Toxoplasma gondii]	70697	71	2	protozoário
gi|156322163	hypothetical protein	[Nematostella vectensis]	20183	109	3	Cnidaria
gi|471435055	phycobilisome	[Chondrus crispus]	27281	68	3	Rhodophyta
gi|519704859	phycocyanin	[Grateloupia taiwanensis]	17645	376	7	Rhodophyta
gi|585685	phycocyanin	[Porphyridium purpureum]	18330	123	2	Rhodophyta
gi|386868010	phycocyanin	[Palmaria palmata]	17580	63	2	Rhodophyta
gi|11465843	phycocyanin	[Porphyra purpurea]	18357	80	2	Rhodophyta
gi|11465843	phycocyanin	[Porphyra purpurea]	18357	156	3	Rhodophyta
gi|11465843	phycocyanin	[Porphyra purpurea]	18357	128	2	Rhodophyta
gi|130021	phycocyanin	[Aglaothamnion neglectum]	17854	116	2	Rhodophyta
gi|11465843	phycocyanin	[Porphyra purpurea]	18357	145	2	Rhodophyta
gi|40786771	phycoerythrin	[Plocamium telfairiae]	18071	86	2	Rhodophyta
gi|21314463	phycoerythrin	[Corallina officinalis]	17779	154	4	Rhodophyta
gi|2317690	phycoerythrin	[Pyropia yezoensis]	17853	112	2	Rhodophyta
gi|51210020	phycoerythrin	[Gracilaria tenuistipitata var. liui]	17956	109	2	Rhodophyta
gi|73761947	phycoerythrin	[Ceramium secundatum]	14010	212	9	Rhodophyta
gi|51210020	phycoerythrin	[Gracilaria tenuistipitata var. liui]	17956	179	5	Rhodophyta
gi|338221412	phycoerythrin	[Palmaria palmata]	17799	156	2	Rhodophyta
gi|409168188	phycoerythrin	[Sparlingia pertusa]	18686	96	2	Rhodophyta
gi|165988347	phycoerythrin	[Callithamnion baileyi]	17201	137	2	Rhodophyta
gi|338221411	phycoerythrin	[Palmaria palmata]	18852	96	3	Rhodophyta
gi|338221411	phycoerythrin	[Palmaria palmata]	18852	78	2	Rhodophyta
gi|338221411	phycoerythrin	[Palmaria palmata]	18852	75	2	Rhodophyta
gi|338221411	phycoerythrin	[Palmaria palmata]	18852	144	4	Rhodophyta
gi|338221411	phycoerythrin	[Palmaria palmata]	18852	75	2	Rhodophyta
gi|21314462	phycoerythrin	[Corallina officinalis]	18950	279	6	Rhodophyta
gi|338221411	phycoerythrin	[Palmaria palmata]	18852	262	5	Rhodophyta
gi|266776	phycoerythrin	[Porphyridium sordidum]	18884	125	3	Rhodophyta
gi|266776	phycoerythrin	[Porphyridium sordidum]	18884	126	2	Rhodophyta
gi|266776	phycoerythrin	[Porphyridium sordidum]	18884	127	3	Rhodophyta
gi|3914333	phycoerythrin	[Pyropia tenera]	17883	138	2	Rhodophyta
gi|266775	phycoerythrin	[Polysiphonia boldii]	19166	81	3	Rhodophyta
gi|40786772	phycoerythrin	[Plocamium telfairiae]	15467	131	2	Rhodophyta
gi|40786772	phycoerythrin	[Plocamium telfairiae]	15467	154	4	Rhodophyta
gi|40786772	phycoerythrin	[Plocamium telfairiae]	15467	186	3	Rhodophyta
gi|40786772	phycoerythrin	[Plocamium telfairiae]	15467	148	2	Rhodophyta
gi|40786772	phycoerythrin	[Plocamium telfairiae]	15467	248	3	Rhodophyta
gi|40786772	phycoerythrin	[Plocamium telfairiae]	15467	419	6	Rhodophyta
gi|40786772	phycoerythrin	[Plocamium telfairiae]	15467	511	8	Rhodophyta
gi|40786772	phycoerythrin	[Plocamium telfairiae]	15467	249	4	Rhodophyta
gi|40786772	phycoerythrin	[Plocamium telfairiae]	15467	190	4	Rhodophyta
gi|40786772	phycoerythrin	[Plocamium telfairiae]	15467	355	12	Rhodophyta
gi|40786771	phycoerythrin	[Plocamium telfairiae]	18071	115	3	Rhodophyta
gi|40786771	phycoerythrin	[Plocamium telfairiae]	18071	135	2	Rhodophyta
gi|40786771	phycoerythrin	[Plocamium telfairiae]	18071	202	5	Rhodophyta
gi|40786772	phycoerythrin	[Plocamium telfairiae]	15467	179	3	Rhodophyta
gi|21314463	phycoerythrin	[Corallina officinalis]	17779	148	2	Rhodophyta
gi|338221412	phycoerythrin	[Palmaria palmata]	17799	121	2	Rhodophyta
gi|338221412	phycoerythrin	[Palmaria palmata]	17799	175	2	Rhodophyta
gi|338221412	phycoerythrin	[Palmaria palmata]	17799	196	2	Rhodophyta
gi|51210020	phycoerythrin	[Gracilaria tenuistipitata var. liui]	17956	79	2	Rhodophyta
gi|21314463	phycoerythrin	[Corallina officinalis]	17779	244	7	Rhodophyta
gi|409168188	phycoerythrin	[Sparlingia pertusa]	18686	123	4	Rhodophyta
gi|338221411	phycoerythrin	[Palmaria palmata]	18852	121	3	Rhodophyta
gi|266776	phycoerythrin	[Porphyridium sordidum]	18884	251	6	Rhodophyta
gi|546308632	Plastid oxygen-evolving enhancer 1	[Chondrus crispus]	26225	65	2	Rhodophyta
gi|30352127	ribulose 1,5-bisphosphate carboxylase	[Bostrychia moritziana]	5396	86	2	Rhodophyta
gi|471435045	ribulose-1,5-bisphosphate carboxylase	[Chondrus crispus]	33804	134	3	Rhodophyta
gi|132134	ribulose-1,5-bisphosphate carboxylase	[Antithamnion sp.]	16247	99	2	Rhodophyta
gi|13924773	ribulose-1,5-bisphosphate carboxylase	[Acrosorium venulosum]	51609	491	10	Rhodophyta
gi|13924773	ribulose-1,5-bisphosphate carboxylase	[Acrosorium venulosum]	51609	348	8	Rhodophyta
gi|15987295	ribulose-1,5-bisphosphate carboxylase	[Hymenena multipartita]	52371	524	14	Rhodophyta
gi|343978728	ribulose-1,5-bisphosphate carboxylase	[Plocamium cartilagineum]	51397	479	13	Rhodophyta
gi|15987295	ribulose-1,5-bisphosphate carboxylase	[Hymenena multipartita]	52371	352	8	Rhodophyta
gi|343978728	ribulose-1,5-bisphosphate carboxylase	[Plocamium cartilagineum]	51397	399	12	Rhodophyta
gi|347947	ribulose-1,5-bisphosphate carboxylase	[Gelidium americanum]	54489	201	4	Rhodophyta
gi|15987295	ribulose-1,5-bisphosphate carboxylase	[Hymenena multipartita]	52371	194	4	Rhodophyta
gi|68137854	ribulose-1,5-bisphosphate carboxylase	[Heteroptilon pappeanum]	53218	432	14	Rhodophyta
gi|343978728	ribulose-1,5-bisphosphate carboxylase	[Plocamium cartilagineum]	51397	409	13	Rhodophyta
gi|22094065	ribulose-1,5-bisphosphate carboxylase	[Gelidium vittatum]	53196	323	9	Rhodophyta
gi|343978728	ribulose-1,5-bisphosphate carboxylase	[Plocamium cartilagineum]	51397	203	5	Rhodophyta
gi|33384625	ribulose-1,5-bisphosphate carboxylase	[Antithamnionella ternifolia]	45549	76	2	Rhodophyta
gi|363806593	ribulose-1,5-bisphosphate carboxylase	[Ceramium rubrum var. barbatum]	45780	115	2	Rhodophyta
gi|961529	ribulose-1,5-bisphosphate carboxylase	[Plocamium cartilagineum]	48847	384	12	Rhodophyta
gi|429484577	ribulose-1,5-bisphosphate carboxylase	[Phacelocarpus peperocarpos]	50229	354	9	Rhodophyta
gi|427920370	ribulose-1,5-bisphosphate carboxylase	[Plocamium maggsiae]	50535	417	13	Rhodophyta
gi|961529	ribulose-1,5-bisphosphate carboxylase	[Plocamium cartilagineum]	48847	316	11	Rhodophyta
gi|427920370	ribulose-1,5-bisphosphate carboxylase	[Plocamium maggsiae]	50535	471	15	Rhodophyta
gi|429484577	ribulose-1,5-bisphosphate carboxylase	[Phacelocarpus peperocarpos]	50229	536	16	Rhodophyta
gi|427920370	ribulose-1,5-bisphosphate carboxylase	[Plocamium maggsiae]	50535	511	16	Rhodophyta
gi|3581616	ribulose-1,5-bisphosphate carboxylase	[Gelidiella acerosa]	50918	477	10	Rhodophyta
gi|755516	ribulose-1,5-bisphosphate carboxylase	[Plocamium cartilagineum]	48804	261	8	Rhodophyta
gi|961533	ribulose-1,5-bisphosphate carboxylase	[Plocamium sp.]	41887	270	7	Rhodophyta
gi|455075	ribulose-1,5-bisphosphate carboxylase	[Plocamium cartilagineum]	44096	261	7	Rhodophyta
gi|427920370	ribulose-1,5-bisphosphate carboxylase	[Plocamium maggsiae]	50535	245	7	Rhodophyta
gi|451172827	ribulose-1,5-bisphosphate carboxylase	[Plocamium serrulatum]	49630	431	5	Rhodophyta
gi|429484577	ribulose-1,5-bisphosphate carboxylase	[Phacelocarpus peperocarpos]	50229	412	13	Rhodophyta
gi|427920370	ribulose-1,5-bisphosphate carboxylase	[Plocamium maggsiae]	50535	374	12	Rhodophyta
gi|455075	ribulose-1,5-bisphosphate carboxylase	[Plocamium cartilagineum]	44096	306	10	Rhodophyta
gi|451172827	ribulose-1,5-bisphosphate carboxylase	[Plocamium serrulatum]	49630	314	9	Rhodophyta
gi|451172827	ribulose-1,5-bisphosphate carboxylase	[Plocamium serrulatum]	49630	191	4	Rhodophyta
gi|432134483	ribulose-1,5-bisphosphate carboxylase	[Renouxia sp. GWS-2012]	50198	107	3	Rhodophyta
gi|429484577	ribulose-1,5-bisphosphate carboxylase	[Phacelocarpus peperocarpos]	50229	456	15	Rhodophyta
gi|961529	ribulose-1,5-bisphosphate carboxylase	[Plocamium cartilagineum]	48847	312	10	Rhodophyta
gi|432134483	ribulose-1,5-bisphosphate carboxylase	[Renouxia sp. GWS-2012]	50198	129	5	Rhodophyta
gi|455075	ribulose-1,5-bisphosphate carboxylase	[Plocamium cartilagineum]	44096	100	3	Rhodophyta
gi|34303851	ribulose-1,5-bisphosphate carboxylase	[Plocamium serrulatum]	5973	185	3	Rhodophyta
gi|13924773	ribulose-1,5-bisphosphate carboxylase	[Acrosorium venulosum]	51609	211	4	Rhodophyta
gi|13924828	ribulose-1,5-bisphosphate carboxylase	[Cryptopleura lobulifera]	53210	206	5	Rhodophyta
gi|343978728	ribulose-1,5-bisphosphate carboxylase	[Plocamium cartilagineum]	51397	377	11	Rhodophyta

## Sheet: 3A
Protein Identification	Protein Number	Organism	Protein Mass	Score	Number of Matched Peptides	Phyllum
gi|514749793	actin	[Setaria italica]	51882	81	2	Rhodophyta
gi|5751	actin	[Bombyx mori]	42207	247	4	Arthropoda
gi|11465728	allophycocyanin	[Porphyra purpurea]	17669	176	5	Rhodophyta
gi|11465728	allophycocyanin	[Porphyra purpurea]	17669	117	2	Rhodophyta
gi|595789497	allophycocyanin	[Gracilaria salicornia]	17625	366	6	Rhodophyta
gi|641453089	allophycocyanin	[Cyanidiaceae sp. MX-AZ01]	17865	158	4	Rhodophyta
gi|519704838	allophycocyanin	[Grateloupia taiwanensis]	17587	249	5	Rhodophyta
gi|501379579	allophycocyanin	[Nostoc punctiforme]	17442	162	4	Cyanobacteria
gi|471435007	allophycocyanin	[Chondrus crispus]	17539	115	3	Rhodophyta
gi|738534591	allophycocyanin	[Myxosarcina sp. GI1]	17770	88	3	Cyanobacteria
gi|738534591	allophycocyanin	[Myxosarcina sp. GI1]	17770	121	3	Cyanobacteria
gi|505034356	allophycocyanin	[Cyanobacterium stanieri]	17605	97	3	Cyanobacteria
gi|170293961	ATP synthase	[Picocystis salinarum]	39510	152	4	Chlorophyta
gi|671725368	ATP synthase	[Solenostoma sphaerocarpum]	41061	129	2	Bryophyta
gi|37720943	ATP synthase	[Triantha glutinosa]	52757	140	3	Monocots
gi|537844082	ATP synthase	[Diplazium latifrons]	43252			Plantae
gi|3098140	heat shock protein 70	[Toxoplasma gondii]	70697	71	2	Protozoário
gi|519704859	phycocyanin	[Grateloupia taiwanensis]	17645	287	5	Rhodophyta
gi|753170542	phycocyanin	[Vertebrata lanosa]	18625	165	3	Rhodophyta
gi|595789556	phycocyanin	[Gracilaria salicornia]	18424	143	2	Rhodophyta
gi|130031	phycocyanin	[Aglaothamnion neglectum]	18290	85	2	Rhodophyta
gi|585685	phycocyanin	[Porphyridium purpureum]	18330	186	3	Rhodophyta
gi|386868010	phycocyanin	[Palmaria palmata]	17580	233	3	Rhodophyta
gi|386868010	phycocyanin	[Palmaria palmata]	17580	103	2	Rhodophyta
gi|550279370	phycocyanin	[Rubidibacter lacunae]	17802	146	2	Cyanobacteria
gi|266776	phycoerythrin	[Porphyridium sordidum]	18884	238	6	Rhodophyta
gi|3914333	phycoerythrin	[Pyropia tenera]	17883	469	8	Rhodophyta
gi|6093709	phycoerythrin	[Griffithsia monilis]	17886	229	5	Rhodophyta
gi|409168189	phycoerythrin	[Sparlingia pertusa]	17976	196	4	Rhodophyta
gi|409168189	phycoerythrin	[Sparlingia pertusa]	17976	523	11	Rhodophyta
gi|21314463	phycoerythrin	[Corallina officinalis]	17779	179	3	Rhodophyta
gi|21314463	phycoerythrin	[Corallina officinalis]	17779	131	2	Rhodophyta
gi|40786772	phycoerythrin	[Plocamium telfairiae]	15467	148	2	Rhodophyta
gi|2317690	phycoerythrin	[Pyropia yezoensis]	17853	112	2	Rhodophyta
gi|51210020	phycoerythrin	[Gracilaria tenuistipitata var. liui]	17956	106	2	Rhodophyta
gi|165988341	phycoerythrin	[Ptilota gunneri]	13477	418	6	Rhodophyta
gi|338221412	phycoerythrin	[Palmaria palmata]	17799	341	5	Rhodophyta
gi|51210020	phycoerythrin	[Gracilaria tenuistipitata var. liui]	17956	196	3	Rhodophyta
gi|409168188	phycoerythrin	[Sparlingia pertusa]	18686	96	2	Rhodophyta
gi|165988347	phycoerythrin	[Callithamnion baileyi]	17201	137	2	Rhodophyta
gi|338221411	phycoerythrin	[Palmaria palmata]	18852	96	3	Rhodophyta
gi|338221411	phycoerythrin	[Palmaria palmata]	18852	78	2	Rhodophyta
gi|338221411	phycoerythrin	[Palmaria palmata]	18852	194	4	Rhodophyta
gi|595789548	phycoerythrin	[Gracilaria salicornia]	17897	175	3	Rhodophyta
gi|266776	phycoerythrin	[Porphyridium sordidum]	18884	126	2	Rhodophyta
gi|3914333	phycoerythrin	[Pyropia tenera]	17883	138	2	Rhodophyta
gi|40786772	phycoerythrin	[Plocamium telfairiae]	15467	154	4	Rhodophyta
gi|40786772	phycoerythrin	[Plocamium telfairiae]	15467	186	3	Rhodophyta
gi|40786772	phycoerythrin	[Plocamium telfairiae]	15467	373	6	Rhodophyta
gi|40786772	phycoerythrin	[Plocamium telfairiae]	15467	393	10	Rhodophyta
gi|40786771	phycoerythrin	[Plocamium telfairiae]	18071	151	2	Rhodophyta
gi|338221411	phycoerythrin	[Palmaria palmata]	18852	75	2	Rhodophyta
gi|546308632	Plastid oxygen-evolving enhancer 1	[Chondrus crispus]	26225	119	3	Rhodophyta
gi|471435045	ribulose 1,5-bisphosphate carboxylase	[Chondrus crispus]	33804	144	4	Rhodophyta
gi|30352127	ribulose 1,5-bisphosphate carboxylase	[Bostrychia moritziana]	5396	86	2	Rhodophyta
gi|15987295	ribulose 1,5-bisphosphate carboxylase	[Hymenena multipartita]	52371	352	8	Rhodophyta
gi|1335751	ribulose 1,5-bisphosphate carboxylase	[Sebdenia monardiana]	47666	207	5	Rhodophyta
gi|15987295	ribulose 1,5-bisphosphate carboxylase	[Hymenena multipartita]	52371	339	10	Rhodophyta
gi|197359220	ribulose 1,5-bisphosphate carboxylase	[uncultured bacterium]	30685	66	3	bacteria
gi|343978728	ribulose 1,5-bisphosphate carboxylase	[Plocamium cartilagineum]	51397	105	4	Rhodophyta
gi|85539908	ribulose 1,5-bisphosphate carboxylase	[Thorea okadae]	54391	101	3	Rhodophyta
gi|429484577	ribulose 1,5-bisphosphate carboxylase	[Phacelocarpus peperocarpos]	50229	354	9	Rhodophyta
gi|427920370	ribulose 1,5-bisphosphate carboxylase	[Plocamium maggsiae]	50535	417	13	Rhodophyta
gi|429484577	ribulose 1,5-bisphosphate carboxylase	[Phacelocarpus peperocarpos]	50229	395	13	Rhodophyta
gi|451172827	ribulose 1,5-bisphosphate carboxylase	[Plocamium serrulatum]	49630	314	9	Rhodophyta
gi|755556	ribulose 1,5-bisphosphate carboxylase	[Erythrodermis traillii]	49075	243	8	Rhodophyta
gi|432134483	ribulose 1,5-bisphosphate carboxylase	[Renouxia sp. GWS-2012]	50198	235	9	Rhodophyta
gi|132134	ribulose 1,5-bisphosphate carboxylase	[Antithamnion sp.]	16247	149	3	Rhodophyta
gi|132134	ribulose 1,5-bisphosphate carboxylase	[Antithamnion sp.]	16247	218	5	Rhodophyta
gi|13924773	ribulose-1,5-bisphosphate carboxylase	[Acrosorium venulosum]	51609	491	14	Rhodophyta
gi|13924773	ribulose-1,5-bisphosphate carboxylase	[Acrosorium venulosum]	51609	348	8	Rhodophyta
gi|13924773	ribulose-1,5-bisphosphate carboxylase	[Acrosorium venulosum]	51609	211	4	Rhodophyta
gi|343978728	ribulose-1,5-bisphosphate carboxylase	[Plocamium cartilagineum]	51397	399	12	Rhodophyta
gi|15987295	ribulose-1,5-bisphosphate carboxylase	[Hymenena multipartita]	52371	524	14	Rhodophyta
gi|319918176	ribulose-1,5-bisphosphate carboxylase	[Polysiphonia morrowii]	47897	274	9	Rhodophyta
gi|15987295	ribulose-1,5-bisphosphate carboxylase	[Hymenena multipartita]	52371	411	12	Rhodophyta
gi|347947	ribulose-1,5-bisphosphate carboxylase	[Gelidium americanum]	54489	201	4	Rhodophyta
gi|15987295	ribulose-1,5-bisphosphate carboxylase	[Hymenena multipartita]	52371	194	4	Rhodophyta
gi|343978728	ribulose-1,5-bisphosphate carboxylase	[Plocamium cartilagineum]	51397	122	2	Rhodophyta
gi|363806593	ribulose-1,5-bisphosphate carboxylase	[Ceramium rubrum var. barbatum]	45780	115	2	Rhodophyta
gi|429484577	ribulose-1,5-bisphosphate carboxylase	[Phacelocarpus peperocarpos]	50229	536	16	Rhodophyta
gi|427920370	ribulose-1,5-bisphosphate carboxylase	[Plocamium maggsiae]	50535	511	16	Rhodophyta
gi|3581616	ribulose-1,5-bisphosphate carboxylase	[Gelidiella acerosa]	50918	477	14	Rhodophyta
gi|429484577	ribulose-1,5-bisphosphate carboxylase	[Phacelocarpus peperocarpos]	50229	412	13	Rhodophyta
gi|329343306	ribulose-1,5-bisphosphate carboxylase	[Toxarium hennedyanum]	52960	162	7	Bacillariophyta
gi|451172827	ribulose-1,5-bisphosphate carboxylase	[Plocamium serrulatum]	49630	191	4	Rhodophyta
gi|432134483	ribulose-1,5-bisphosphate carboxylase	[Renouxia sp. GWS-2012]	50198	107	3	Rhodophyta
gi|34303851	ribulose-1,5-bisphosphate carboxylase	[Plocamium serrulatum]	5973	193	4	Rhodophyta
gi|7199	unnamed protein product	[Dictyostelium discoideum]	42117	262	4	Mycetozoa

## Sheet: 4A
Protein Identification	Protein Number	Organism	Protein Mass	Score	Number of Matched Peptides	Phyllum
gi|546306319	40S ribosomal protein S4	[Chondrus crispus]	29827	81	2	Rhodophyta
gi|391346879	actin	[Metaseiulus occidentalis]	42247	299	6	Arthropoda
gi|198438156	actin	[Ciona intestinalis]+++	42062	267	8	Chordata
gi|384367948	actin	[Dasyatis akajei]	35530	374	7	Chordata
gi|641735869	actin	[Eptesicus fuscus]	37056	94	3	Chordata
gi|113283	actin	[Styela clava]	42325	337	5	Chordata
gi|113255	actin	[Artemia sp.] +++	42210	604	11	Arthropoda
gi|313507212	actin		42006	543	11
gi|514691994	actin	[Salpingoeca rosetta]	41940	692	10	Eukaryota
gi|33946351	actin	[Thecamoeba similis]	42056	332	6	Eukaryota
gi|315572190	actin	[Gonaxis craveni]	19806	343	4	Gastropoda
gi|32127373	actin	[Kazachstania exigua]	36639	284	5	Ascomycota
gi|1703158	actin	[Puccinia graminis]+++	42060	390	8	Fungi
gi|11465728	allophycocyanin	[Porphyra purpurea]	17669	162	4	Rhodophyta
gi|595789497	allophycocyanin	[Gracilaria salicornia]	17625	88	3	Rhodophyta
gi|451810084	allophycocyanin	[Palmaria palmata]	17558	205	5	Rhodophyta
gi|451810084	allophycocyanin	[Palmaria palmata]	17558	80	2	Rhodophyta
gi|545705420	allophycocyanin	[Galdieria sulphuraria]	27938	132	3	Rhodophyta
gi|501379579	allophycocyanin	[Nostoc punctiforme]	17442	94	2	Cyanobacteria
gi|501379579	allophycocyanin	[Nostoc punctiforme]	17442	111	2	Cyanobacteria
gi|471435007	allophycocyanin	[Chondrus crispus]	17539	122	4	Rhodophyta
gi|471435008	allophycocyanin	[Chondrus crispus]	17692	94	3	Rhodophyta
gi|129987	allophycocyanin	[Aglaothamnion neglectum]	17645	195	4	Rhodophyta
gi|129991	allophycocyanin	[Microchaete diplosiphon]	17411	75	2	Cyanobacteria
gi|129987	allophycocyanin	[Aglaothamnion neglectum]	17645	100	2	Rhodophyta
gi|52788827	ATP synthase	[Azolla filiculoides]	41431	233	9	Pteridophyta
gi|11465708	ATP synthase	[Porphyra purpurea]	54386	80	2	Rhodophyta
gi|299830569	ATP synthase	[Durinskia baltica]	54415	123	3	Miozoa
gi|659680836	ATP synthase	[Prasinophyceae sp. CCMP1205]	51860	326	10	Chlorophyta
gi|374534597	ATP synthase	[Mercenaria sp. JV-2012]	46145	198	5	Mollusca
gi|546299755	ATP synthase	[Chondrus crispus]	57507	246	5	Rhodophyta
gi|11466709	ATP synthase	[Marchantia polymorpha]	53204	292	6	Plantae
gi|115349966	ATP synthase	[Stigeoclonium helveticum]	52397	119	4	Chlorophyta
gi|115349966	ATP synthase	[Stigeoclonium helveticum]	52397	305	10	Chlorophyta
gi|115349966	ATP synthase	[Stigeoclonium helveticum]	52397	70	3	Chlorophyta
gi|20467355	ATPase	[Zamia pumila]	47968	241	9	Plantae
gi|171110	ATPase	[Saccharomyces cerevisiae]	54947	163	4	Ascomycota
gi|545703931	ATPase	[Galdieria sulphuraria]	59748	204	4	Rhodophyta
gi|519704856	CfxQ	[Grateloupia taiwanensis]	33744	132	3	Rhodophyta
gi|524892924	collagen	[Aplysia californica]	53515	144	2	Mollusca
gi|300508144	elongation factor	[Callophyllis japonica]	27351	82	2	Rhodophyta
gi|546299288	fructose-1,6-biphosphate aldolase	[Chondrus crispus]	42929	92	2	Rhodophyta
gi|30580445	glyceraldehyde-3-phosphate dehydrogenase	[Mucor circinelloides f. lusitanicus]	36508	115	2	Zygomycota
gi|703090381	heat shock protein 70	[Morus notabilis]	71262	70	2	Plantae/Magnoliophyta
gi|328813889	heat shock protein 70	[Microdera dzhungarica punctipennis]	71110	120	2	Arthropoda
gi|254304514	heat shock protein 70	[Portunus trituberculatus]	69336	74	2	Arthropoda
gi|32401019	histone	[Griffithsia japonica]	16895	122	3	Rhodophyta
gi|260782839	hypothetical protein	[Branchiostoma floridae]	21891	138	3	Chordata
gi|260782839	hypothetical protein	[Branchiostoma floridae]	21891	74	2	Chordata
gi|260782839	hypothetical protein	[Branchiostoma floridae]+++	21891	119	3	Chordata
gi|156322163	hypothetical protein	[Nematostella vectensis]+++	20183	195	5	Cnidaria
gi|524915332	paramyosin	[Aplysia californica]	73181	88	2	Mollusca
gi|524915332	paramyosin	[Aplysia californica]	73181	109	2	Mollusca
gi|519704859	phycocyanin	[Grateloupia taiwanensis]	17645	102	3	Rhodophyta
gi|595789557	phycocyanin	[Gracilaria salicornia]	17649	101	2	Rhodophyta
gi|519704859	phycocyanin	[Grateloupia taiwanensis]	17645	149	3	Rhodophyta
gi|386868010	phycocyanin	[Palmaria palmata]	17580	123	2	Rhodophyta
gi|386868010	phycocyanin	[Palmaria palmata]	17580	71	2	Rhodophyta
gi|386868010	phycocyanin	[Palmaria palmata]	17580	121	2	Rhodophyta
gi|386868010	phycocyanin	[Palmaria palmata]	17580	99	2	Rhodophyta
gi|501673311	phycocyanin	[Calliarthron tuberculosum]	17614	186	3	Rhodophyta
gi|501673311	phycocyanin	[Calliarthron tuberculosum]	17614	154	3	Rhodophyta
gi|51210030	phycocyanin	[Gracilaria tenuistipitata var. liui]	17691	117	2	Rhodophyta
gi|130031	phycocyanin	[Aglaothamnion neglectum]	18290	81	2	Rhodophyta
gi|130031	phycocyanin	[Aglaothamnion neglectum]	18290	106	2	Rhodophyta
gi|130031	phycocyanin	[Aglaothamnion neglectum]	18290	95	2	Rhodophyta
gi|90994568	phycocyanin	[Pyropia yezoensis]	18360	90	2	Rhodophyta
gi|585685	phycocyanin	[Porphyridium purpureum]	18330	138	2	Rhodophyta
gi|550279370	phycocyanin	[Rubidibacter lacunae]	17802	110	2	Cyanobacteria
gi|6093709	phycoerythrin	[Griffithsia monilis]	17886	206	5	Rhodophyta
gi|40786772	phycoerythrin	[Plocamium telfairiae]	15467	375	5	Rhodophyta
gi|40786772	phycoerythrin	[Plocamium telfairiae]	15467	438	6	Rhodophyta
gi|40786772	phycoerythrin	[Plocamium telfairiae]	15467	499	5	Rhodophyta
gi|40786772	phycoerythrin	[Plocamium telfairiae]	15467	520	8	Rhodophyta
gi|40786772	phycoerythrin	[Plocamium telfairiae]	15467	464	7	Rhodophyta
gi|40786772	phycoerythrin	[Plocamium telfairiae]	15467	475	12	Rhodophyta
gi|40786771	phycoerythrin	[Plocamium telfairiae]	18071	89	2	Rhodophyta
gi|40786771	phycoerythrin	[Plocamium telfairiae]	18071	143	2	Rhodophyta
gi|40786771	phycoerythrin	[Plocamium telfairiae]	18071	153	2	Rhodophyta
gi|40786771	phycoerythrin	[Plocamium telfairiae]	18071	140	5	Rhodophyta
gi|3914333	phycoerythrin	[Pyropia tenera]	17883	164	2	Rhodophyta
gi|6093709	phycoerythrin	[Griffithsia monilis]	17886	117	3	Rhodophyta
gi|409168189	phycoerythrin	[Sparlingia pertusa]	17976	512	12	Rhodophyta
gi|21314463	phycoerythrin	[Corallina officinalis]	17779	341	3	Rhodophyta
gi|73761921	phycoerythrin	[Aglaothamnion callophyllidicola]	13919	274	4	Rhodophyta
gi|51210020	phycoerythrin	[Gracilaria tenuistipitata var. liui]	17956	154	2	Rhodophyta
gi|51210020	phycoerythrin	[Gracilaria tenuistipitata var. liui]	17956	145	2	Rhodophyta
gi|73761921	phycoerythrin	[Aglaothamnion callophyllidicola]	13919	220	4	Rhodophyta
gi|22001332	phycoerythrin	[Ceramium boydenii]	17932	460	9	Rhodophyta
gi|165988341	phycoerythrin	[Ptilota gunneri]	13477	414	9	Rhodophyta
gi|51210020	phycoerythrin	[Gracilaria tenuistipitata var. liui]	17956	215	3	Rhodophyta
gi|266776	phycoerythrin	[Porphyridium sordidum]	18884	84	2	Rhodophyta
gi|266776	phycoerythrin	[Porphyridium sordidum]	18884	121	3	Rhodophyta
gi|266776	phycoerythrin	[Porphyridium sordidum]	18884	131	4	Rhodophyta
gi|338221411	phycoerythrin	[Palmaria palmata]	18852	123	3	Rhodophyta
gi|165988365	phycoerythrin	[Ptilota gunneri]	17581	123	3	Rhodophyta
gi|338221411	phycoerythrin	[Palmaria palmata]	18852	93	3	Rhodophyta
gi|338221411	phycoerythrin	[Palmaria palmata]	18852	122	3	Rhodophyta
gi|338221411	phycoerythrin	[Palmaria palmata]	18852	81	2	Rhodophyta
gi|338221411	phycoerythrin	[Palmaria palmata]	18852	160	4	Rhodophyta
gi|471435045	ribulose-1,5-bisphosphate carboxylase	[Chondrus crispus]	33804	131	3	Rhodophyta
gi|132134	ribulose-1,5-bisphosphate carboxylase	[Antithamnion sp.]	16247	93	3	Rhodophyta
gi|132134	ribulose-1,5-bisphosphate carboxylase	[Antithamnion sp.]	16247	167	4	Rhodophyta
gi|132134	ribulose-1,5-bisphosphate carboxylase	[Antithamnion sp.]	16247	201	4	Rhodophyta
gi|24636542	ribulose-1,5-bisphosphate carboxylase	[Polyopes tasmanicus]	46314	246	5
gi|132134	ribulose-1,5-bisphosphate carboxylase	[Antithamnion sp.]	16247	106	3	Rhodophyta
gi|30352127	ribulose-1,5-bisphosphate carboxylase	[Bostrychia moritziana]	5396	84	3	Rhodophyta
gi|30352127	ribulose-1,5-bisphosphate carboxylase	[Bostrychia moritziana]	5396	101	3	Rhodophyta
gi|402898	ribulose-1,5-bisphosphate carboxylase	[Pterocladiella capillacea]+++	54503	149	5	Rhodophyta
gi|343978728	ribulose-1,5-bisphosphate carboxylase	[Plocamium cartilagineum]	51397	512	15	Rhodophyta
gi|22094065	ribulose-1,5-bisphosphate carboxylase	[Gelidium vittatum]	53196	353	9	Rhodophyta
gi|56968263	ribulose-1,5-bisphosphate carboxylase	[Gracilaria bursa-pastoris]	43596	313	10	Rhodophyta
gi|1335751	ribulose-1,5-bisphosphate carboxylase	[Sebdenia monardiana]	47666	247	8	Rhodophyta
gi|343978728	ribulose-1,5-bisphosphate carboxylase	[Plocamium cartilagineum]	51397	339	8	Rhodophyta
gi|85539908	ribulose-1,5-bisphosphate carboxylase	[Thorea okadae]	54391	204	6	Rhodophyta
gi|1335751	ribulose-1,5-bisphosphate carboxylase	[Sebdenia monardiana]	47666	175	4	Rhodophyta
gi|15987299	ribulose-1,5-bisphosphate carboxylase	[Hymenena venosa]	53112	186	4	Rhodophyta
gi|343978728	ribulose-1,5-bisphosphate carboxylase	[Plocamium cartilagineum]	51397	146	4	Rhodophyta
gi|34100800	ribulose-1,5-bisphosphate carboxylase	[Anotrichium tenue]	52680	393	7	Rhodophyta
gi|11612137	ribulose-1,5-bisphosphate carboxylase	[Pterocladiella beachiae]	52843	341	5	Rhodophyta
gi|85539908	ribulose-1,5-bisphosphate carboxylase	[Thorea okadae]	54391	265	6	Rhodophyta
gi|319918176	ribulose-1,5-bisphosphate carboxylase	[Polysiphonia morrowii]	47897	183	4	Rhodophyta
gi|363806611	ribulose-1,5-bisphosphate carboxylase	[Ceramium siliquosum]	45914	269	9	Rhodophyta
gi|114152447	ribulose-1,5-bisphosphate carboxylase	[Nemalion sp. N10]	53293	174	4	Rhodophyta
gi|114152497	ribulose-1,5-bisphosphate carboxylase	[Plocamium cartilagineum]	51885	61	2	Rhodophyta
gi|114152497	ribulose-1,5-bisphosphate carboxylase	[Plocamium cartilagineum]	51885	102	4	Rhodophyta
gi|187960482	ribulose-1,5-bisphosphate carboxylase	[Gloiopeltis furcata]	53215	456	13	Rhodophyta
gi|321495889	ribulose-1,5-bisphosphate carboxylase	[Kallymenia sp. GCZ-2011]	47883	296	10	Rhodophyta
gi|427920370	ribulose-1,5-bisphosphate carboxylase	[Plocamium maggsiae]	50535	556	16	Rhodophyta
gi|429484577	ribulose-1,5-bisphosphate carboxylase	[Phacelocarpus peperocarpos]	50229	482	15	Rhodophyta
gi|451172827	ribulose-1,5-bisphosphate carboxylase	[Plocamium serrulatum]	49630	414	11	Rhodophyta
gi|427920370	ribulose-1,5-bisphosphate carboxylase	[Plocamium maggsiae]	50535	423	7	Rhodophyta
gi|432134483	ribulose-1,5-bisphosphate carboxylase	[Renouxia sp. GWS-2012]	50198	116	4	Rhodophyta
gi|546317766	Sulfate adenylyltransferase	[Chondrus crispus]	46598	97	2	Rhodophyta
gi|1174752	tropomyosin	[Biomphalaria glabrata]	32696	117	2	Mollusca
gi|219806590	tropomyosin	[Neptunea polycostata]	33111	97	2	Mollusca
gi|33304714	ubiquitin/actin fusion protein	[Bigelowiella natans]	51325	121	3	Cercozoa
gi|33346945	ubiquitin/actin fusion protein	[Gymnochlora stellata]	49580	191	4	Cercozoa

## Sheet: 5B
Protein Identification	Protein Number	Organism	Protein Mass	Score	Number of Matched Peptides	Phyllum
gi|546307169	14-3-3 protein	[Chondrus crispus]	29108	86	3	Rhodophyta
gi|129987	allophycocyanin	[Aglaothamnion neglectum]	17645	72	2	Rhodophyta
gi|129991	allophycocyanin	[Microchaete diplosiphon]	17411	145	3	Cyanobacteria
gi|129991	allophycocyanin	[Microchaete diplosiphon]	17411	92	2	Cyanobacteria
gi|129991	allophycocyanin	[Microchaete diplosiphon]	17411	166	4	Cyanobacteria
gi|129991	allophycocyanin	[Microchaete diplosiphon]	17411	145	3	Cyanobacteria
gi|595789497	allophycocyanin	[Gracilaria salicornia]	17625	186	5	Rhodophyta
gi|595789497	allophycocyanin	[Gracilaria salicornia]	17625	221	5	Rhodophyta
gi|471435007	allophycocyanin	[Chondrus crispus]	17539	121	3	Rhodophyta
gi|471435007	allophycocyanin	[Chondrus crispus]	17539	160	4	Rhodophyta
gi|30468177	allophycocyanin	[Cyanidioschyzon merolae strain 10D]	17907	140	4	Rhodophyta
gi|595789497	allophycocyanin	[Gracilaria salicornia]	17625	204	4	Rhodophyta
gi|501379579	allophycocyanin	[Nostoc punctiforme]	17442	112	3	Cyanobacteria
gi|545705420	allophycocyanin	[Galdieria sulphuraria]	27938	68	2	Rhodophyta
gi|299830569	ATP synthase	[Durinskia baltica]	54415	103	2	Miozoa
gi|51209988	ATP synthase	[Gracilaria tenuistipitata var. liui]	54504	97	3	Rhodophyta
gi|169303154	ATP synthase	[Aglaothamnion callophyllidicola]	43233	153	3	Rhodophyta
gi|52788827	ATP synthase	[Azolla filiculoides]	41431	108	4	Pteridophyta
gi|156069299	ATP synthase	[Dryopteris maximowiczii]	42059	116	3	Pteridophyta
gi|37720943	ATP synthase	[Triantha glutinosa]	52757	520	12	Pteridophyta
gi|399078	ATP synthase	[Antithamnion sp.]	54683	98	2	Rhodophyta
gi|498953924	ATP synthase	[Ceratitis capitata]	60883	182	5	Arthropoda
gi|545703931	ATPase	[Galdieria sulphuraria]	59748	171	4	Rhodophyta
gi|546299755	ATPase	[Chondrus crispus]	57507	383	7	Rhodophyta
gi|546299208	cbbX	[Chondrus crispus]	40959	107	2	Rhodophyta
gi|519704856	CfxQ	[Grateloupia taiwanensis]	33744	158	3	Rhodophyta
gi|24462122	elongation factor	[Stylonema alsidii]	35514	138	2	Rhodophyta
gi|24462122	elongation factor	[Stylonema alsidii]	35514	218	4	Rhodophyta
gi|546299288	fructose-1,6-biphosphate aldolase	[Chondrus crispus]	42929	196	4	Rhodophyta
gi|232116	glyceraldehyde-3-phosphate dehydrogenase	[Gracilaria gracilis]	44708	65	2	Rhodophyta
gi|232116	glyceraldehyde-3-phosphate dehydrogenase	[Gracilaria gracilis]	44708	63	2	Rhodophyta
gi|232116	glyceraldehyde-3-phosphate dehydrogenase	[Gracilaria gracilis]	44708	76	2	Rhodophyta
gi|40062609	haloalkane dehalogenase	[uncultured marine bacterium 311]	33412	68	2	bacteria
gi|130031	phycocyanin	[Aglaothamnion neglectum]	18290	83	2	Rhodophyta
gi|11465843	phycocyanin	[Porphyra purpurea]	18357	86	2	Rhodophyta
gi|409168189	phycoerythrin	[Sparlingia pertusa]	17976	263	5	Rhodophyta
gi|40786772	phycoerythrin	[Plocamium telfairiae]	15467	215	4	Rhodophyta
gi|40786772	phycoerythrin	[Plocamium telfairiae]	15467	187	3	Rhodophyta
gi|40786772	phycoerythrin	[Plocamium telfairiae]	15467	268	5	Rhodophyta
gi|40786772	phycoerythrin	[Plocamium telfairiae]	15467	258	6	Rhodophyta
gi|40786772	phycoerythrin	[Plocamium telfairiae]	15467	309	5	Rhodophyta
gi|40786772	phycoerythrin	[Plocamium telfairiae]	15467	338	6	Rhodophyta
gi|40786772	phycoerythrin	[Plocamium telfairiae]	15467	488	9	Rhodophyta
gi|40786772	phycoerythrin	[Plocamium telfairiae]	15467	389	7	Rhodophyta
gi|40786772	phycoerythrin	[Plocamium telfairiae]	15467	176	3	Rhodophyta
gi|73761923	phycoerythrin	[Aglaothamnion halliae]	13957	196	4	Rhodophyta
gi|73761923	phycoerythrin	[Aglaothamnion halliae]	13957	173	3	Rhodophyta
gi|2317690	phycoerythrin	[Pyropia yezoensis]	17853	136	2	Rhodophyta
gi|40786771	phycoerythrin	[Plocamium telfairiae]	18071	135	3	Rhodophyta
gi|40786771	phycoerythrin	[Plocamium telfairiae]	18071	99	2	Rhodophyta
gi|40786771	phycoerythrin	[Plocamium telfairiae]	18071	158	2	Rhodophyta
gi|40786771	phycoerythrin	[Plocamium telfairiae]	18071	167	2	Rhodophyta
gi|40786771	phycoerythrin	[Plocamium telfairiae]	18071	163	2	Rhodophyta
gi|546308632	Plastid oxygen-evolving enhancer	[Chondrus crispus]	26225	66	2	Rhodophyta
gi|343978728	ribulose-1,5-bisphosphate carboxylase	[Plocamium cartilagineum]	51397	363	11	Rhodophyta
gi|162286693	ribulose-1,5-bisphosphate carboxylase	[Gelidiella acerosa]	53332	248	6	Rhodophyta
gi|85539908	ribulose-1,5-bisphosphate carboxylase	[Thorea okadae]	54391	230	9	Rhodophyta
gi|343978728	ribulose-1,5-bisphosphate carboxylase	[Plocamium cartilagineum]	51397	250	7	Rhodophyta
gi|85539912	ribulose-1,5-bisphosphate carboxylase	[Thorea riekei]	54343	233	7	Rhodophyta
gi|343978728	ribulose-1,5-bisphosphate carboxylase	[Plocamium cartilagineum]	51397	262	7	Rhodophyta
gi|162286693	ribulose-1,5-bisphosphate carboxylase	[Gelidiella acerosa]	53332	117	3	Rhodophyta
gi|343978728	ribulose-1,5-bisphosphate carboxylase	[Plocamium cartilagineum]	51397	293	8	Rhodophyta
gi|22652824	ribulose-1,5-bisphosphate carboxylase	[Thorea violacea]	44493	164	5	Rhodophyta
gi|343978728	ribulose-1,5-bisphosphate carboxylase	[Plocamium cartilagineum]	51397	308	8	Rhodophyta
gi|162286693	ribulose-1,5-bisphosphate carboxylase	[Gelidiella acerosa]	53332	192	5	Rhodophyta
gi|85539908	ribulose-1,5-bisphosphate carboxylase	[Thorea okadae]	54391	185	7	Rhodophyta
gi|755528	ribulose-1,5-bisphosphate carboxylase	[Turnerella mertensiana]	48399	100	5	Rhodophyta
gi|187960492	ribulose-1,5-bisphosphate carboxylase	[Phacelocarpus sessilis]	53896	311	10	Rhodophyta
gi|427920370	ribulose-1,5-bisphosphate carboxylase	[Plocamium maggsiae]	50535	230	7	Rhodophyta
gi|432134483	ribulose-1,5-bisphosphate carboxylase	[Renouxia sp. GWS-2012]	50198	130	6	Rhodophyta
gi|187960492	ribulose-1,5-bisphosphate carboxylase	[Phacelocarpus sessilis]	53896	259	8	Rhodophyta
gi|427920370	ribulose-1,5-bisphosphate carboxylase	[Plocamium maggsiae]	50535	354	9	Rhodophyta
gi|432134483	ribulose-1,5-bisphosphate carboxylase	[Renouxia sp. GWS-2012]	50198	201	7	Rhodophyta
gi|34303851	ribulose-1,5-bisphosphate carboxylase	[Plocamium serrulatum]	5973	66	2	Rhodophyta
gi|546303700	Translation elongation factor	[Chondrus crispus]	51194	137	3	Rhodophyta
gi|226499592	uncharacterized protein	[Zea mays]	29594	73	3	Plantae
gi|395835409	uncharacterized protein	[Otolemur garnettii]	145653	213	5	Chordata

## Sheet: 7B
Protein Identification	Protein Number	Organism	Protein Mass	Score	Number of Matched Peptides	Phyllum
gi|129991	allophycocyanin	[Microchaete diplosiphon]	17411	79	2	Cyanobacteria
gi|129991	allophycocyanin	[Microchaete diplosiphon]	17411	87	2	Cyanobacteria
gi|129991	allophycocyanin	[Microchaete diplosiphon] +++	17411	78	2	Cyanobacteria
gi|129991	allophycocyanin	[Microchaete diplosiphon]	17411	76	2	Cyanobacteria
gi|595789497	allophycocyanin	[Gracilaria salicornia]	17625	200	4	Rhodophyta
gi|501379579	allophycocyanin	[Nostoc punctiforme]	17442	107	2	Cyanobacteria
gi|471435007	allophycocyanin	[Chondrus crispus]	17539	102	3	Rhodophyta
gi|519704838	allophycocyanin	[Grateloupia taiwanensis]	17587	192	5	Rhodophyta
gi|399078	ATP synthase	[Antithamnion sp.]	54683	88	2	Rhodophyta
gi|399078	ATP synthase	[Antithamnion sp.]	54683	62	2	Rhodophyta
gi|232116	glyceraldehyde-3-phosphate dehydrogenase	[Gracilaria gracilis]	44708	66	2	Rhodophyta
gi|519704859	phycocyanin	[Grateloupia taiwanensis]	17645	242	6	Rhodophyta
gi|409168189	phycoerythrin	[Sparlingia pertusa]	17976	162	3	Rhodophyta
gi|40786772	phycoerythrin	[Plocamium telfairiae]	15467	193	3	Rhodophyta
gi|21314463	phycoerythrin	[Corallina officinalis]	17779	86	2	Rhodophyta
gi|40786772	phycoerythrin	[Plocamium telfairiae]	15467	244	4	Rhodophyta
gi|40786772	phycoerythrin	[Plocamium telfairiae]	15467	244	4	Rhodophyta
gi|40786772	phycoerythrin	[Plocamium telfairiae]	15467	411	16	Rhodophyta
gi|40786772	phycoerythrin	[Plocamium telfairiae]	15467	191	3	Rhodophyta
gi|21314463	phycoerythrin	[Corallina officinalis]	17779	215	3	Rhodophyta
gi|165988341	phycoerythrin	[Ptilota gunneri]	13477	65	4	Rhodophyta
gi|40786771	phycoerythrin	[Plocamium telfairiae]	18071	130	2	Rhodophyta
gi|40786771	phycoerythrin	[Plocamium telfairiae]	18071	127	2	Rhodophyta
gi|40786771	phycoerythrin	[Plocamium telfairiae]	18071	129	2	Rhodophyta
gi|40786771	phycoerythrin	[Plocamium telfairiae]	18071	138	5	Rhodophyta
gi|13924831	ribulose-1,5-bisphosphate carboxylase	[Cryptopleura ruprechtiana]	52817	245	6	Rhodophyta
gi|22652824	ribulose-1,5-bisphosphate carboxylase	[Thorea violacea]	44493	171	7	Rhodophyta
gi|343978728	ribulose-1,5-bisphosphate carboxylase	[Plocamium cartilagineum]	51397	377	10	Rhodophyta
gi|162286693	ribulose-1,5-bisphosphate carboxylase	[Gelidiella acerosa]	53332	187	4	Rhodophyta
gi|85539908	ribulose-1,5-bisphosphate carboxylase	[Thorea okadae]	54391	187	6	Rhodophyta
gi|85539908	ribulose-1,5-bisphosphate carboxylase	[Thorea okadae]	54391	243	8	Rhodophyta
gi|343978728	ribulose-1,5-bisphosphate carboxylase	[Plocamium cartilagineum]	51397	363	10	Rhodophyta
gi|85539908	ribulose-1,5-bisphosphate carboxylase	[Thorea okadae]	54391	212	8	Rhodophyta
gi|961533	ribulose-1,5-bisphosphate carboxylase	[Plocamium sp.]	41887	366	10	Rhodophyta
gi|187960492	ribulose-1,5-bisphosphate carboxylase	[Phacelocarpus sessilis]	53896	301	9	Rhodophyta
gi|427920370	ribulose-1,5-bisphosphate carboxylase	[Plocamium maggsiae]	50535	333	10	Rhodophyta
gi|432134483	ribulose-1,5-bisphosphate carboxylase	[Renouxia sp. GWS-2012]	50198	165	7	Rhodophyta
gi|961533	ribulose-1,5-bisphosphate carboxylase	[Plocamium cartilagineum]	41887	250	6	Rhodophyta
gi|961533	ribulose-1,5-bisphosphate carboxylase	[Plocamium sp.]	41887	253	9	Rhodophyta
gi|187960492	ribulose-1,5-bisphosphate carboxylase	[Phacelocarpus sessilis]	53896	349	10	Rhodophyta
gi|34303851	ribulose-1,5-bisphosphate carboxylase	[Plocamium serrulatum]	5973	145	4	Rhodophyta

## Sheet: 10B
Protein Identification	Protein Number	Organism	Protein Mass	Score	Number of Matched Peptides	Phyllum
gi|129988	allophycocyanin	[Anabaena cylindrica]	17128	62	2	Cyanobacteria
gi|129987	allophycocyanin	[Aglaothamnion neglectum]	17645	101	3	Rhodophyta
gi|129987	allophycocyanin	[Aglaothamnion neglectum]	17645	79	2	Rhodophyta
gi|129991	allophycocyanin	[Microchaete diplosiphon]	17411	64	2	Cyanobacteria
gi|595789497	allophycocyanin	[Gracilaria salicornia]	17625	240	6	Rhodophyta
gi|595789497	allophycocyanin	[Gracilaria salicornia]	17625	141	4	Rhodophyta
gi|595789497	allophycocyanin	[Gracilaria salicornia]	17625	178	5	Rhodophyta
gi|595789497	allophycocyanin	[Gracilaria salicornia]	17625	145	5	Rhodophyta
gi|501379579	allophycocyanin	[Nostoc punctiforme]	17442	149	3	Cyanobacteria
gi|471435007	allophycocyanin	[Chondrus crispus]	17539	86	3	Rhodophyta
gi|471435007	allophycocyanin	[Chondrus crispus]	17539	144	3	Rhodophyta
gi|471435008	allophycocyanin	[Chondrus crispus]	17692	93	3	Rhodophyta
gi|471435008	allophycocyanin	[Chondrus crispus]	17692	163	5	Rhodophyta
gi|299830569	ATP synthase	[Durinskia baltica]	54415	153	3	Miozoa
gi|169303154	ATP synthase	[Aglaothamnion callophyllidicola]	43233	150	3	Rhodophyta
gi|224830504	ATP synthase	[Cissampelos andromorpha]	50458	422	9	Plantae
gi|471435010	ATP synthase	[Chondrus crispus]	50891	388	9	Rhodophyta
gi|52788827	ATP synthase	[Azolla filiculoides]	41431	122	5	Pteridophyta
gi|115349966	ATP synthase	[Stigeoclonium helveticum]	52397	116	3	Chlorophyta
gi|115349966	ATP synthase	[Stigeoclonium helveticum]	52397	97	3	Chlorophyta
gi|12004115	ATP synthase	[Douglasia nivalis]	52439	425	9	Plantae
gi|8452711	ATP synthase	[Opilia sp. Chase 1902]	51985	424	9	Embryophyta
gi|17224770	ATP synthase	[Burmannia lutescens]	17230	140	3	Tracheophyta
gi|13236786	ATP synthase	[Burretiokentia hapala]	53750	199	6	Plantae
gi|671725368	ATP synthase	[Solenostoma sphaerocarpum]	41061	112	2	Bryophyta
gi|671725368	ATP synthase	[Solenostoma sphaerocarpum]	41061	126	2	Bryophyta
gi|37720943	ATP synthase	[Triantha glutinosa]	52757	398	9	Plantae
gi|399078	ATP synthase	[Antithamnion sp.]	54683	81	2	Rhodophyta
gi|399078	ATP synthase	[Antithamnion sp.]	54683	120	2	Rhodophyta
gi|399078	ATP synthase	[Antithamnion sp.]	54683	154	4	Rhodophyta
gi|171110	ATPase	[Saccharomyces cerevisiae]	54947	101	3	Ascomycota
gi|546299755	ATPase	[Chondrus crispus]	57507	387	8	Rhodophyta
gi|24462122	elongation factor	[Stylonema alsidii]	35514	224	3	Rhodophyta
gi|24462122	elongation factor	[Stylonema alsidii]	35514	140	2	Rhodophyta
gi|232116	glyceraldehyde-3-phosphate dehydrogenase	[Gracilaria gracilis]	44708	66	2	Rhodophyta
gi|528915583	haloalkane dehalogenase	[Rhodobacteraceae bacterium UDC319]	32789	64	2	Proteobacteria
gi|528915583	haloalkane dehalogenase	[Rhodobacteraceae bacterium UDC319]	32789	64	2	Proteobacteria
gi|32394610	heat shock protein 70	[Griffithsia japonica]	22949	99	2	Rhodophyta
gi|51210017	phycobilisome	[Gracilaria tenuistipitata var. liui]	27378	67	2	Rhodophyta
gi|519704859	phycocyanin	[Grateloupia taiwanensis]	17645	491	8	Rhodophyta
gi|409168189	phycoerythrin	[Sparlingia pertusa]	17976	175	3	Rhodophyta
gi|409168189	phycoerythrin	[Sparlingia pertusa]	17976	141	3	Rhodophyta
gi|40786772	phycoerythrin	[Plocamium telfairiae]	15467	406	9	Rhodophyta
gi|40786772	phycoerythrin	[Plocamium telfairiae]	15467	458	6	Rhodophyta
gi|40786772	phycoerythrin	[Plocamium telfairiae]	15467	188	3	Rhodophyta
gi|40786772	phycoerythrin	[Plocamium telfairiae]	15467	264	5	Rhodophyta
gi|40786772	phycoerythrin	[Plocamium telfairiae]	15467	255	4	Rhodophyta
gi|40786772	phycoerythrin	[Plocamium telfairiae]	15467	253	5	Rhodophyta
gi|40786772	phycoerythrin	[Plocamium telfairiae]	15467	277	5	Rhodophyta
gi|40786772	phycoerythrin	[Plocamium telfairiae]	15467	415	7	Rhodophyta
gi|40786772	phycoerythrin	[Plocamium telfairiae]	15467	374	5	Rhodophyta
gi|40786772	phycoerythrin	[Plocamium telfairiae]	15467	551	18	Rhodophyta
gi|21314463	phycoerythrin	[Corallina officinalis]	17779	131	2	Rhodophyta
gi|40786771	phycoerythrin	[Plocamium telfairiae]	18071	119	2	Rhodophyta
gi|40786771	phycoerythrin	[Plocamium telfairiae]	18071	101	2	Rhodophyta
gi|40786771	phycoerythrin	[Plocamium telfairiae]	18071	187	5	Rhodophyta
gi|40786771	phycoerythrin	[Plocamium telfairiae]	18071	141	2	Rhodophyta
gi|40786771	phycoerythrin	[Plocamium telfairiae]	18071	161	2	Rhodophyta
gi|40786771	phycoerythrin	[Plocamium telfairiae]	18071	149	2	Rhodophyta
gi|546308632	Plastid oxygen-evolving enhancer 1	[Chondrus crispus]	26225	69	2	Rhodophyta
gi|546299208	cbbX	[Chondrus crispus]	40959	81	2	Rhodophyta
gi|471435045	ribulose-1,5-bisphosphate carboxylase	[Chondrus crispus]	33804	211	4	Rhodophyta
gi|130058	phycoerythrin	[Aglaothamnion neglectum]	??	66	2	Rhodophyta
gi|501673301	phycoerythrin	[Calliarthron tuberculosum]	17883	493	15	Rhodophyta
gi|132134	ribulose-1,5-bisphosphate carboxylase	[Antithamnion sp.]	16247	194	6	Rhodophyta
gi|56684695	ribulose-1,5-bisphosphate carboxylase	[Gracilaria vieillardii]	51846	171	6	Rhodophyta
gi|85539908	ribulose-1,5-bisphosphate carboxylase	[Thorea okadae]	54391	265	8	Rhodophyta
gi|343978728	ribulose-1,5-bisphosphate carboxylase	[Plocamium cartilagineum]	51397	373	10	Rhodophyta
gi|85539908	ribulose-1,5-bisphosphate carboxylase	[Thorea okadae]	54391	263	8	Rhodophyta
gi|343978728	ribulose-1,5-bisphosphate carboxylase	[Plocamium cartilagineum]	51397	254	7	Rhodophyta
gi|22652824	ribulose-1,5-bisphosphate carboxylase	[Thorea violacea]	44493	154	6	Rhodophyta
gi|343978728	ribulose-1,5-bisphosphate carboxylase	[Plocamium cartilagineum]	51397	381	10	Rhodophyta
gi|68137858	ribulose-1,5-bisphosphate carboxylase	[Callithamnion pikeanum]	54315	323	9	Rhodophyta
gi|56684695	ribulose-1,5-bisphosphate carboxylase	[Gracilaria vieillardii]	51846	151	5	Rhodophyta
gi|85539908	ribulose-1,5-bisphosphate carboxylase	[Thorea okadae]	54391	261	6	Rhodophyta
gi|85539904	ribulose-1,5-bisphosphate carboxylase	[Thorea hispida]	54347	258	5	Rhodophyta
gi|343978728	ribulose-1,5-bisphosphate carboxylase	[Plocamium cartilagineum]	51397	277	6	Rhodophyta
gi|85539912	ribulose-1,5-bisphosphate carboxylase	[Thorea riekei]	54343	197	5	Rhodophyta
gi|85539908	ribulose-1,5-bisphosphate carboxylase	[Thorea okadae]	54391	161	5	Rhodophyta
gi|40218313	ribulose-1,5-bisphosphate carboxylase	[Kumanoa gracillima]	47389	159	4	Rhodophyta
gi|189308381	ribulose-1,5-bisphosphate carboxylase	[Stypopodium hawaiiensis]	43626	142	4	Ochrophyta
gi|343978728	ribulose-1,5-bisphosphate carboxylase	[Plocamium cartilagineum]	51397	118	3	Rhodophyta
gi|34303851	ribulose-1,5-bisphosphate carboxylase	[Plocamium serrulatum]	5973	216	3	Rhodophyta
gi|34303851	ribulose-1,5-bisphosphate carboxylase	[Plocamium serrulatum]	5973	243	8	Rhodophyta
gi|427920370	ribulose-1,5-bisphosphate carboxylase	[Plocamium maggsiae]	50535	207	7	Rhodophyta
gi|187960492	ribulose-1,5-bisphosphate carboxylase	[Phacelocarpus sessilis]	53896	332	9	Rhodophyta
gi|755528	ribulose-1,5-bisphosphate carboxylase	[Turnerella mertensiana]	48399	167	7	Rhodophyta
gi|961539	ribulose-1,5-bisphosphate carboxylase	[Sarcodia ceylanica]	52461	256	6	Rhodophyta
gi|432134483	ribulose-1,5-bisphosphate carboxylase	[Renouxia sp. GWS-2012]	50198	177	7	Rhodophyta
gi|34303851	ribulose-1,5-bisphosphate carboxylase	[Plocamium serrulatum]	5973	142	3	Rhodophyta
